# Supplementary material for: Synchronized long-read genome, methylome, epigenome, and transcriptome for resolving a Mendelian condition
Source: PubMed Central journal article supplement (PMC10557686; doi:10.1101/2023.09.26.559521), 2023-09-27
Supplement: NIHPP2023.09.26.559521v1-supplement-1.pdf [file NIHPP2023.09.26.559521v1-supplement-1.pdf]

**Supplementary Table 1. Clinical evaluation of proband**

| Biochemical test                    | Result                                                                                |
|-------------------------------------|---------------------------------------------------------------------------------------|
| MMA                                 | 2.00 mcml/L (Reference range <0.30) High                                              |
| Homocysteine                        | 5.6 umol/L (Reference range <9) Normal                                                |
| Vitamin B12                         | 1,581 pg/mL (Reference range 213-816) High                                            |
| Plasma Amino Acids                  | Normal with Alanine 464 (Reference range 145-495)                                     |
| Very long chain fatty acids (VLCFA) | Normal                                                                                |
| Urine Organic Acids                 | Increased excretion of methylmalonic acid and trace amounts of methylcitric acid.     |
| CK                                  | Normal                                                                                |
| GDF15                               | Elevated                                                                              |
| Blood Lactate                       | 5.9 mmol/L High                                                                       |
| Ammonia                             | 42 umol/L Normal                                                                      |
| Plasma CMMPP                        | Cobalamin, methionine, and MMA pathways; not suggestive of disorder of MMA metabolism |
| ETC Enzyme analysis (muscle)        | Normal                                                                                |

| Imaging test   | Result                                                                                                                                                                                                                                                                                                                                                                                                                                                                                                                                                                                                                                                              |
|----------------|---------------------------------------------------------------------------------------------------------------------------------------------------------------------------------------------------------------------------------------------------------------------------------------------------------------------------------------------------------------------------------------------------------------------------------------------------------------------------------------------------------------------------------------------------------------------------------------------------------------------------------------------------------------------|
| Echocardiogram | Patent Foramen Ovale (PFO). Otherwise normal                                                                                                                                                                                                                                                                                                                                                                                                                                                                                                                                                                                                                        |
| MRI Brain      | <ol style="list-style-type: none"> <li>1. Suggestion of polymicrogyria predominating within the bilateral frontal lobes. It is noted that a syndrome of frontal predominant polymicrogyria, bilateral retinoblastoma, hypotonia, and dysmorphic facies has been described in the setting of an interstitial 13q deletion. Correlation with genetic testing is suggested.</li> <li>2. No abnormal intracranial enhancement or evidence of pituitary or pineal mass.</li> <li>3. Foci of susceptibility artifact along the bilateral caudothalamic grooves suggests sequela of remote hemorrhage.</li> <li>4. No acute intracranial hemorrhage or infarct.</li> </ol> |
| MRI Orbit      | <ol style="list-style-type: none"> <li>1. Enhancing bilateral ocular masses consistent with bilateral retinoblastomas confined to the globes. These measure up to 0.4 x 1.2 x 0.8 cm on the right and 0.3 x 0.8 x 0.6 cm on the left.</li> </ol>                                                                                                                                                                                                                                                                                                                                                                                                                    |

| <b>Pathology test</b>     | <b>Result</b>                                                                                                                                                                                                                                                                                                                                                                                                                                                                                                                                                                                                                                                                                                                                                                                                                                                                                                                                                                                                                               |
|---------------------------|---------------------------------------------------------------------------------------------------------------------------------------------------------------------------------------------------------------------------------------------------------------------------------------------------------------------------------------------------------------------------------------------------------------------------------------------------------------------------------------------------------------------------------------------------------------------------------------------------------------------------------------------------------------------------------------------------------------------------------------------------------------------------------------------------------------------------------------------------------------------------------------------------------------------------------------------------------------------------------------------------------------------------------------------|
| Right thigh muscle biopsy | Electron microscopy examination of the submitted previously frozen muscle biopsy reveals the fibers to display indistinct myofibrillary organization, favored to represent an artifact of specimen preservation. Deviation from normal ultrastructural morphology includes degenerate mitochondria appearing as electron dense membranous inclusions within the myocyte and endothelial cells. The mitochondria are otherwise normal in distribution and quantity, with most displaying no significant morphologic abnormalities. It is possible these represent the pathologic expression of a primary mitochondriopathy; however, artifactual degeneration of the mitochondria resulting from freezing of the tissue and delayed fixation cannot be excluded. No nemaline bodies or other unusual structures are detected. Reduplications of the basement membrane are not seen. No tubuloreticular inclusions are observed. No unusual lysosomal storage product is found. Glycogen is present in normal amount. Lipid is not increased. |

| <b>Retinoblastoma history</b> |                                            |
|-------------------------------|--------------------------------------------|
| Initial diagnosis:            | 5 months                                   |
| Presenting Stage:             | Right Eye: cT2a (C), Left Eye: cT1b (B)    |
| Treatment:                    | Chemotherapy + Laser therapy + cryotherapy |

| <b>Physical exam</b>  |
|-----------------------|
| High arched palate    |
| Retrognathia          |
| Hypotonia             |
| Wide Nasal bridge     |
| Telecanthus           |
| Widow's peak          |
| Pierre Robin sequence |

**Supplementary Table 2. Summary of prior genetic evaluations for proband**

| Genetic test                          | Result                                                                                                                                                                                                                                                               | Interpretation                                                                                                                                                                                                                                   |
|---------------------------------------|----------------------------------------------------------------------------------------------------------------------------------------------------------------------------------------------------------------------------------------------------------------------|--------------------------------------------------------------------------------------------------------------------------------------------------------------------------------------------------------------------------------------------------|
| SNP array                             | arr(1-22,X)x2                                                                                                                                                                                                                                                        | Nondiagnostic.                                                                                                                                                                                                                                   |
| PWS/AS methylation                    | Normal pattern                                                                                                                                                                                                                                                       | Nondiagnostic.                                                                                                                                                                                                                                   |
| Comprehensive neuromuscular panel     | Negative                                                                                                                                                                                                                                                             | Nondiagnostic.                                                                                                                                                                                                                                   |
| Karyotype and FISH for <i>RB1</i>     | 46,XX,t(X;13)(p22.1;q14.1)                                                                                                                                                                                                                                           | Apparently balanced X;13 translocation; <i>RB1</i> is unlikely to be disrupted at the breakpoint.                                                                                                                                                |
| Cellular energetics panel +mtDNA      | m.14568C>T (p.Gly36Ser) Pathogenic variant at 4% heteroplasmy                                                                                                                                                                                                        | Nondiagnostic. m.14568C>T (p.Gly36Ser) thought to be unrelated to phenotype d/t low heteroplasmy in both fibroblast and blood sample.                                                                                                            |
| <i>RB1</i> sequencing                 | Negative                                                                                                                                                                                                                                                             | Nondiagnostic.                                                                                                                                                                                                                                   |
| <i>RB1</i> RNA sequencing             | No variants reported; <i>RB1</i> expression "low end of normal"                                                                                                                                                                                                      | Indeterminate.                                                                                                                                                                                                                                   |
| Trio exome sequencing +CNVs and mtDNA | Heterozygous maternally inherited <i>ABCC6</i> c.1850C>G (p.Ser617Ter) Likely Pathogenic variant<br>Heterozygous paternally inherited <i>LAMC2</i> c.508C>T (p.Arg170Ter) Likely Pathogenic variant                                                                  | Nondiagnostic. Heterozygous variants in genes associated with recessive phenotypes that do not match patient's phenotype.                                                                                                                        |
| Trio genome sequencing +mtDNA         | m.14568C>T (p.Gly36Ser) Pathogenic variant at 5% heteroplasmy<br>Heterozygous maternally inherited <i>ABCC6</i> c.1850C>G (p.Ser617Ter) Likely Pathogenic variant<br>Heterozygous paternally inherited <i>LAMC2</i> c.508C>T (p.Arg170Ter) Likely Pathogenic variant | Nondiagnostic. m.14568C>T (p.Gly36Ser) thought to be unrelated to phenotype d/t low heteroplasmy in both fibroblast and blood sample. Heterozygous variants in genes associated with recessive phenotypes that do not match patient's phenotype. |
| m.14568C>T Urine Testing              | Negative                                                                                                                                                                                                                                                             | Nondiagnostic.                                                                                                                                                                                                                                   |
| Maternal karyotypes                   | 46,XX                                                                                                                                                                                                                                                                | Normal                                                                                                                                                                                                                                           |
| Paternal karyotype                    | 46,XY                                                                                                                                                                                                                                                                | Normal                                                                                                                                                                                                                                           |
